# Herramientas para la gestión sostenible de la sedimentación en el embalse de Marmolejo (España)

## *Tools for the sustainable management of sedimentation in the Marmolejo reservoir*

David López-Gómez <sup>a1\*</sup>, Miguel de Blas-Moncalvillo<sup>a2</sup> y Vicente Cuéllar-Moro<sup>b</sup>

<sup>a</sup> Centro de Estudios Hidrográficos. CEDEX. P.º Bajo de la Virgen del Puerto, 3. 28005 Madrid, España.

<sup>b</sup> Wave Crafters S.L. Pº de Moret, 5. Madrid. España.

E-mail: <sup>a1\*</sup> david.lopez@cedex.es

\*Autor para correspondencia

Recibido: 21/09/2023

Aceptado: 22/12/2023

Publicado: 31/01/2024

**Citar como:** López-Gómez, D., de Blas-Moncalvillo, M., Cuéllar-Moro, V. 2024. Tools for the sustainable management of sedimentation in the Marmolejo reservoir. *Ingeniería del agua*, 28(1), 1-16. <https://doi.org/10.4995/ia.2024.20376>

## RESUMEN

La sedimentación del embalse de Marmolejo incrementa el riesgo de inundación en el Municipio de Andújar (Jaén, España) situado en la cola del embalse. La administración hidráulica española ha diseñado una serie de medidas de protección cuya efectividad queda condicionada al nivel de sedimentación del embalse. Con la información batimétrica y de aforos de sedimentos en suspensión se ha calculado la ley de aportación de sedimentos al embalse. Ha sido necesario el empleo de técnicas de supercomputación y *machine learning*, así como un nuevo modelo de transporte de sedimento en suspensión, para calibrar un modelo numérico bidimensional del embalse, que ha permitido reproducir la evolución histórica del proceso de sedimentación. Finalmente se ha desarrollado una herramienta web que simula la sedimentación en el embalse en función del criterio de gestión de compuertas, a fin de optimizar la explotación del embalse y mantener la sedimentación en niveles de seguridad para Andújar.

**Palabras clave** | sedimentación; gestión de sedimentos en embalses; modelización numérica transporte de sedimentos; computación sobre GPU.

## ABSTRACT

*Marmolejo Reservoir sedimentation increases the flooding risk in Andújar village, located at the reservoir tail. The Spanish Hydraulic Administration has designed a set of protection measures whose effectiveness is conditioned by the reservoir sedimentation level. The law of sediment contribution to the reservoir has been calculated with the bathymetric information and suspended sediments gauging. It has been necessary to use supercomputing and machine learning techniques, as well as a new suspended sediment transport model, to calibrate a two-dimensional numerical model of the reservoir. This model makes possible to reproduce the historical evolution of the reservoir sedimentation. Finally, a web tool, that allows simulating the reservoir sedimentation with different gate management criteria, has been developed to optimize the exploitation of the reservoir while maintaining the sedimentation at safe levels in Andújar.*

**Key words** | sedimentation; reservoirs sediment management; sediment transport numerical modeling; GPU computing.

## INTRODUCCIÓN

La vega del río Guadalquivir en el entorno urbano de Andújar, localidad andaluza del sur España, sufre inundaciones de forma recurrente, habiendo registros históricos de muchos episodios de inundaciones a lo largo de los años. En la segunda mitad del siglo XX, toda la cuenca del Guadalquivir, y el entorno de Andújar en particular, ha sufrido profundas transformaciones que han agravado los daños asociados a las inundaciones. En el caso de Andújar las principales modificaciones son tres. En primer lugar, la construcción en 1962 del salto hidroeléctrico de Marmolejo, a unos 16 km aguas abajo de Andújar que, al nivel de explotación, remansa la lámina de agua hasta el puente romano de esta localidad. Aunque la presa no tiene más que unos 20 m de altura sobre cimientos, su explotación, manteniendo el embalse habitualmente al nivel normal, favorece la sedimentación. En segundo lugar, la ocupación de la llanura de inundación en el entorno urbano de Andújar, con rellenos sobre el valle para la construcción de instalaciones deportivas y polígonos industriales. En tercer lugar, el cambio de los usos del suelo de la cuenca, con una explotación extensiva de olivos, que favorece la erosión del suelo y aumenta la carga de sedimento en suspensión (SS) del río Guadalquivir. Con el fin de mejorar la seguridad de Andújar frente a inundaciones, la Confederación Hidrográfica del Guadalquivir (CHG) ha realizado múltiples estudios y actuaciones en el cauce.

La CHG encargó al Centro de Estudios y Experimentación de Obras Públicas (CEDEX) diseñar una serie de medidas para incrementar la seguridad de Andújar frente a inundaciones. En este trabajo se recopilaron las batimetrías correspondientes a 1962, previas a la construcción de la presa, 1997 y 2001, además se obtuvo una nueva batimetría en mayo de 2014 para la realización de este estudio. En 1997 el embalse almacenaba 9.25 hm<sup>3</sup> de sedimento por lo que su capacidad inicial (11.38 hm<sup>3</sup>) se reducía en un 81.3%. Tras las inundaciones de 2010 y 2013, el volumen de sedimento descendió a 7.4 hm<sup>3</sup>. Mediante modelización numérica bidimensional se pudo comprobar que la evolución sedimentológica del embalse afecta a los niveles de inundación. Así mismo, y con apoyo de modelación física se diseñaron una serie de actuaciones, cuya efectividad estaba condicionada al nivel de sedimentación de 2014 (CEDEX, 2015).

De cada una de las batimetrías se ha obtenido un modelo digital del terreno, lo que ha permitido calcular con herramientas GIS la sedimentación en las fechas indicadas (CEDEX, 2021).

**Tabla 1** | Evolución de la sedimentación en el embalse de Marmolejo.

| Fecha de la batimetría | Capacidad embalse (hm <sup>3</sup> ) | Capacidad residual (%) | Volumen de sedimentación (hm <sup>3</sup> ) | Grado de sedimentación (%) | Inc. de volumen sedimentos (hm <sup>3</sup> ) | Incremento de sedimentación (%) |
|------------------------|--------------------------------------|------------------------|---------------------------------------------|----------------------------|-----------------------------------------------|---------------------------------|
| 1962                   | 11.38                                | 100.00                 | 0.00                                        | 0.00                       | 0                                             | 0                               |
| 1997                   | 2.13                                 | 18.73                  | 9.25                                        | 81.27                      | 9.25                                          | 81.27                           |
| 2001                   | 3.29                                 | 28.90                  | 8.09                                        | 71.10                      | -1.16                                         | -10.17                          |
| 2014 (14 abril)        | 4.01                                 | 35.23                  | 7.37                                        | 64.77                      | -0.72                                         | -6.32                           |
| 2018 (7 mayo)          | 3.28                                 | 28.82                  | 8.10                                        | 71.15                      | 0.73                                          | 6.37                            |
| 2019 (27 septiembre)   | 2.48                                 | 21.76                  | 8.91                                        | 78.24                      | 0.81                                          | 7.10                            |
| 2019 (2 de diciembre)  | 2.62                                 | 23.04                  | 8.76                                        | 76.96                      | -0.15                                         | -1.28                           |
| 2020 (14 enero)        | 3.16                                 | 27.73                  | 8.23                                        | 72.27                      | -0.53                                         | -4.70                           |
| 2020 (24 noviembre)    | 2.93                                 | 25.74                  | 8.45                                        | 74.26                      | 0.23                                          | 1.99                            |
| 2021 (25 febrero)      | 2.91                                 | 25.59                  | 8.47                                        | 74.41                      | 0.02                                          | 0.16                            |
| 2021 (15 noviembre)    | 2.70                                 | 23.69                  | 8.69                                        | 76.31                      | 0.22                                          | 1.89                            |
| 2022 (3 noviembre)     | 2.64                                 | 23.20                  | 8.74                                        | 76.80                      | 0.05                                          | 0.44                            |

El objeto de este artículo es mostrar el proceso seguido para el desarrollo de una herramienta de ayuda a la gestión del sedimento del embalse. Para ello se ha modelizado la sedimentación del embalse, empleando técnicas *machine learning* para la calibración y se ha generado una aplicación que simula su evolución sedimentológica en función de la gestión de compuertas.

## MATERIAL Y METODOS

### Modelo hidrodinámico y transporte de sedimentos

La reducida altura de la presa y el nivel de sedimentación del embalse hacen que los calados en la llanura de inundación sean reducidos, predominando un flujo claramente bidimensional. Por lo tanto, se ha considerado adecuado aplicar en este estudio las ecuaciones de Navier Stokes integradas en profundidad para aguas someras, o de Saint Venant para flujo bidimensional.

El diámetro característico del sedimento que circula por el cauce del río Guadalquivir en este tramo es de 35 micras, lo que corresponde a arcillas. El tipo de movimiento predominante por tanto es en suspensión. Para estudiar este transporte se emplea la ecuación de advección-difusión (1) y para analizar la variación de la cota de fondo empleamos la ecuación de balance de masas de Exner (2).

$$\frac{\partial hC}{\partial t} + \frac{\partial hU_x C}{\partial x} + \frac{\partial hU_y C}{\partial y} = \frac{\partial}{\partial x_j} \left( \left( \Gamma + \frac{v_t}{S_{c,t}} \right) h \frac{\partial C}{\partial x_j} \right) + (E - D) \quad (1)$$

Donde:  $h$  es el calado;  $C$  la concentración de SS promediada en profundidad;  $U_x$  y  $U_y$  las componentes de la velocidad;  $v_t$  la viscosidad cinemática turbulenta;  $S_{c,t}$  la constante de Smith y  $\Gamma$  la viscosidad molecular.

$$(1 - p) \frac{\partial Z_b}{\partial t} + \frac{\partial q_{sb,x}}{\partial x} + \frac{\partial q_{sb,y}}{\partial y} = D - E \quad (2)$$

En esta formulación:  $Z_b$  representa la cota del fondo;  $p$  la porosidad del material;  $q_{sb,x}$  y  $q_{sb,y}$  son los caudales adimensionales sólidos en la dirección de los ejes  $x$  e  $y$ ; los términos  $D$  y  $E$  representan la deposición y la erosión derivadas del transporte en suspensión.

Dado que el sedimento que se transporta es arcilloso, se considera adecuado el modelo de Ariathurai y Arulanandan (1978), ecuaciones (3) y (4), que presenta la ventaja de establecer los umbrales de inicio de erosión y sedimentación además de un parámetro de velocidad de erosión, que permiten abordar la calibración con datos experimentales.

$$E = M \left( \frac{\tau_b}{\tau_e} - 1 \right) \quad (3)$$

$$D = W_s c_s \left( 1 - \frac{\tau_b}{\tau_{cd}} \right) \quad (4)$$

$$\tau_b = \gamma h I_f \quad (5)$$

Donde:  $M$  es la velocidad de erosión;  $\tau_b$  es la tensión de fondo;  $\tau_{cd}$  es la tensión crítica de deposición;  $\tau_e$  es la tensión crítica de erosión;  $c_s$  es la concentración de sedimento en el fondo y  $W_s$  es la velocidad de sedimentación, que para este estudio se ha calculado con la formulación de Van Rijn (1984).

### El modelo Iber

Como herramienta numérica para el cálculo hidrodinámico y del transporte de sedimento se ha empleado el modelo Iber. Se trata de un modelo numérico de simulación de flujo turbulento en lámina libre y régimen variable para el estudio hidromorfológico de cauces (Bladé *et al.*, 2014). La resolución numérica de estas ecuaciones se realiza mediante el método de los Volúmenes Finitos. Esto permite plantear un esquema numérico explícito, que garantiza su convergencia con el criterio de Courant. El código ha sido programado en lenguaje FORTRAN por el Instituto Flumen y el Grupo de Enxeñería da Agua e do Medio Ambiente (GEAMA), con el apoyo del *International Centre for Numerical Methods in Engineering* (CIMNE), y el impulso del CEDEX y la Dirección General del Agua (DGA).

Desde la versión 3.0 de Iber se incorpora el módulo R-Iber, desarrollado por el CEDEX, que permite la computación sobre GPU (*Graphic Processing Unit*). Los avances en la industria del videojuego, por los altos requerimientos gráficos, han propiciado

un desarrollo vertiginoso de las GPU. Estos dispositivos han sido desarrollados para resolver de forma simultánea, en millones de hilos de ejecución paralelos, algoritmos sencillos que controlan la iluminación de los píxeles de una pantalla. El lenguaje de programación CUDA permite emplear estas GPU para paralelizar código científico, de forma análoga a los clústeres de CPU, pero con unos costes muy reducidos. Esto ha supuesto una revolución en el campo de la supercomputación que se ha extendido al ámbito de las criptomonedas, de la inteligencia artificial o los CFD (*Computational Fluid Dynamics*). Así, el CEDEX empleó esta tecnología para la paralelización de SPHERIMENTAL (López y Cuéllar, 2011), modelo lagrangiano de partículas tridimensional, basado en el método SPH (*Smoothed Particles Hydrodynamics*) con aplicaciones en el estudio del flujo hidrodinámico en estructuras hidráulicas (López *et al.*, 2016 y 2018), y que ha convertido la modelización numérica en una herramienta fundamental en el Laboratorio de Hidráulica del Centro de Estudios Hidrográficos (CEH-CEDEX). Tras esta experiencia, se decidió optimizar Iber pues resulta necesario abordar estudios con mayor extensión espacial y mayor discretización de malla, proporcionando mayor precisión de los resultados, con tiempos de computación muy reducidos. La paralelización del código de Iber se ha realizado con CUDA FORTRAN, con el fin de mantener la misma estructura del código y que los desarrolladores habituados a programar en FORTRAN se encuentren cómodos en la nueva versión (Sanz-Ramos *et al.*, 2022 y 2023).

Con el fin de caracterizar los rendimientos de computación se ha realizado un análisis empleando como caso de prueba de rotura de presa (*dam break*) tridimensional. Consiste en un depósito cuadrangular relleno de agua con un calado de 1 m y en el centro se dispone otro homotético con 2 m de calado de agua. En el instante inicial se eliminan los contornos del recinto interno a modo de apertura instantánea de compuertas y se analiza la propagación de las ondas en el depósito (Figura 1).

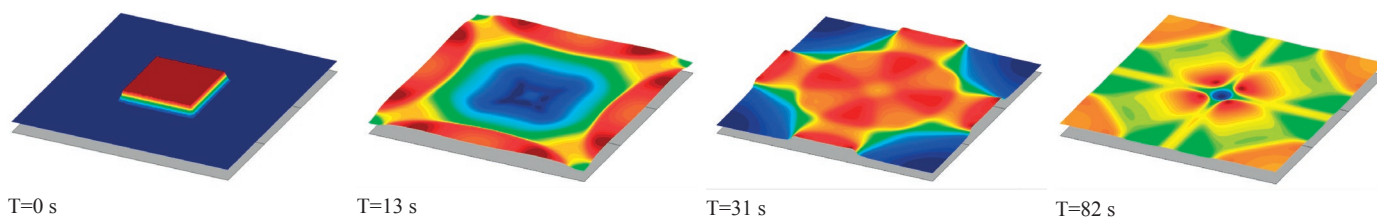

**Figura 1** | Caso de prueba para control de aceleración de R-Iber. El rango de color corresponde al calado con valor máximo de 2 m (rojo).

Esta simulación se ha realizado, con diferentes pasos de malla, con Iber (CPU) y con la versión R-Iber (GPU) para calcular las aceleraciones en tiempo de computación, y ver la influencia del tamaño del problema en el rendimiento. Esta comparativa se ha realizado con una CPU Intel Xeon E5, y dos tarjetas diferentes una NVIDIA GTX-1080 (2560 núcleos CUDA) de arquitectura Pascal y una NVIDIA Tesla V-100 (5120 núcleos CUDA) de arquitectura Volta. La Tabla 2 muestra los rendimientos alcanzados. Se aprecia que con una tarjeta de computación V-100 el tiempo de computación es 843 veces menor en un modelo de 6.4 millones de celdas.

**Tabla 2** | Tiempos de computación en función del hardware utilizado y el número de celdas. Aceleración obtenida.

| N.º celdas | Tiempo Computación (s) |                 |              | Speed up (x) |       |
|------------|------------------------|-----------------|--------------|--------------|-------|
|            | Iber Intel Xeon E5     | R-Iber GTX-1080 | R-Iber V-100 | GTX-1080     | V-100 |
| 22410      | 144.7                  | 4.06            | 3.1          | 35.6         | 46.8  |
| 91068      | 1664.0                 | 15.63           | 7.1          | 106.5        | 235.4 |
| 362668     | 14084.4                | 86.97           | 33.6         | 161.9        | 419.4 |
| 1017378    | 79400.9                | 368.32          | 135.3        | 215.6        | 587.0 |
| 1590610    | 175423.0               | 695.9           | 256.0        | 252.1        | 685.1 |
| 2290424    | 332535.3               | 1238.12         | 447.5        | 268.6        | 743.1 |
| 6390256    | 1692760.0              | 5213.95         | 2006.1       | 324.7        | 843.8 |

## El modelo numérico del embalse

Se ha modelizado un tramo de 16 km del río Guadalquivir, desde la presa de Marmolejo hasta el tramo urbano de Andújar (Figura 2). El cauce se ha discretizado con celdas de 10 metros y la llanura de inundación con elementos de 15 m. Con esto, la malla de cálculo superaba ligeramente los 100000 elementos. En las simulaciones de caudales bajos en los que la lámina de agua se mantenía en el cauce principal, se empleó otro modelo con la misma discretización, pero sin las celdas de la llanura de inundación reduciendo el número de celdas a 38000.

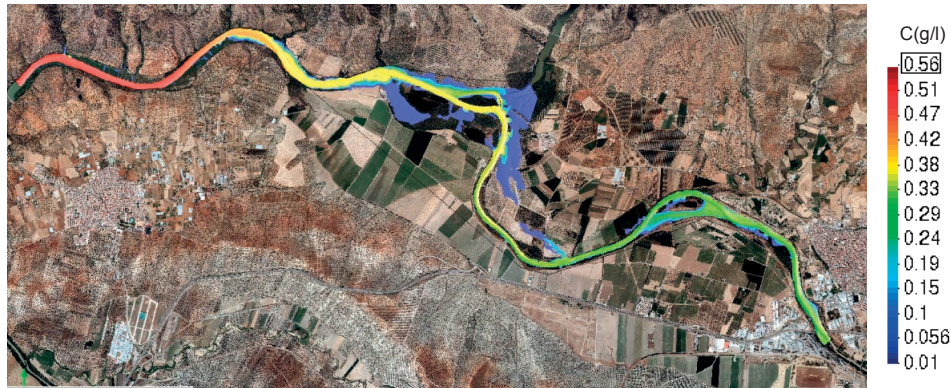

**Figura 2 |** Modelo del embalse de Marmolejo. Vista cenital desde la presa de Marmolejo al puente de la autopista A-4 sobre el Guadalquivir. Campo de concentraciones de sedimento en suspensión.

Como condición de contorno de entrada se emplean los caudales medios diarios de la serie disponible, desde su entrada en servicio en 1963. La condición de contorno de aguas abajo viene fijada por la presa de Marmolejo. Coronada a la cota 193 m s.n.m., dispone de un dique de hormigón coronado a la cota 185.78 m s.n.m. y 7 vanos de 15.25 m. En situación de explotación, lo que supone más del 95 % del tiempo, se maniobran aperturas parciales de compuerta para mantener el nivel de explotación en torno a la cota 191.5 m s.n.m. Solamente en situación de avenidas se elevan totalmente las compuertas quedando el umbral del vertedero de hormigón como sección de control, como se desprende del registro de niveles de la Figura 3a. En el cauce principal se ha empleado una rugosidad de Manning  $n=0.028$  y en la llanura de inundación  $n=0.080$  correspondiente a vegetación dispersa. La condición inicial, empleada para simular la explotación habitual, supone el embalse lleno al nivel normal, aunque esta condición es diferente en otros escenarios. Los cálculos se han realizado con GPUs NVIDIA Tesla V100, en el Centro de Procesamiento de Datos (CPD) del Centro de Estudios Hidrográficos del CEDEX.

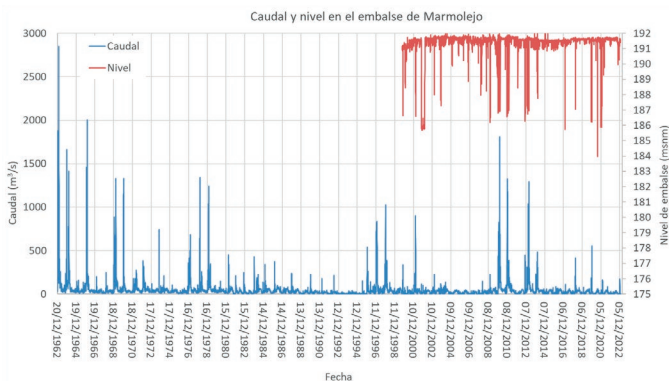

3a

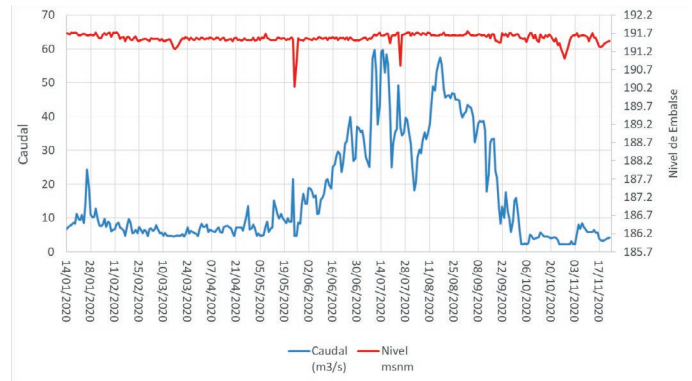

3b

**Figura 3 |** Datos de caudal y nivel medio diario en el embalse de Marmolejo. Serie histórica completa (3a). Periodo del 14 de enero al 24 de septiembre de 2020 (3b)

## Estimación de la carga de sedimentos del caudal afluente al embalse

No existe una red de aforo de caudal sólido en el río Guadalquivir que permita obtener una ley que relacione el caudal líquido con el sólido, y que sirva de condición de contorno de entrada de sedimento. Ante la incertidumbre existente se han empleado diferentes enfoques que proporcionen una visión amplia y permitan obtener una buena aproximación.

## Registro de aforos sólidos de sedimentos en suspensión

Se realizó una revisión bibliográfica (CEDEX, 2014) con información de aforos de sólidos en suspensión, especialmente en crecidas que es cuando se produce la mayor parte del transporte, entre los que cabe destacar el estudio de INTECSA-INARSA (2002, 2003), donde se caracterizó el sedimento del embalse presentando un 58 % de arcillas, un 37 % de limo y un 5 % de arena, con un diámetro característico  $D_{50}$  de 35 micras. En las tesis doctorales de Contreras (2012) y Carpintero (2015), se encontraron datos de aforos de SS durante episodios de avenida. Además, se dispone de los registros del turbidímetro de la estación SAICA de Marmolejo. Complementariamente, se realizaron varias campañas de aforo específicas para este trabajo, con el apoyo de la CHG y ENDESA.

## Volumen de sedimento retenido en un período de sedimentación neto

El período comprendido entre el 15 de enero de 2020 y el 24 de noviembre de 2020, no se produjo ningún episodio de avenidas y el embalse se explotó con aperturas parciales manteniendo en todo momento el nivel de explotación como se muestra en la Figura 3b. En ésta, se aprecia un incremento de aportación en los meses de mayo a octubre debido a los caudales provenientes de los embalses de cabecera, durante la campaña de riegos. En este período se acumularon 0.23 hm<sup>3</sup> de sedimento (Tabla 1). Los muestreos de SS que ha realizado el CEDEX en la cola del embalse y aguas abajo de la presa indican que, en estas circunstancias, el embalse retiene la práctica totalidad del sedimento aportado. Por tanto, este período resulta muy adecuado para calibrar la ley de aportaciones, en el rango bajo de caudales. Aunque para ello es necesario conocer la densidad del sedimento en el embalse.

## Densidad del sedimento en el embalse

Una vez que el sedimento llega al embalse comienza un proceso de decantación, aumentando la concentración del SS a medida que aumenta la profundidad. De hecho, cuando el sedimento predominante es de tipo cohesivo, en las inmediaciones del fondo se crea una interfase con alta concentración de SS, que dificulta la delimitación del fondo del embalse. Además, la entrada de nuevo sedimento va consolidando y compactando el más antiguo, aumentando su densidad con su antigüedad en el embalse. Miller (1953) proporciona un método para calcular la evolución de la densidad del sedimento en función de la densidad inicial:

$$\rho = \rho_i + 0.4343 K \left[ \frac{T}{T-1} (\ln T) - 1 \right] \quad (6)$$

Donde:  $\rho$  es la densidad después de T años de compactación;  $\rho_i$  es densidad inicial, considerada al final del primer año de compactación y K es una constante de compactación. Teniendo en cuenta que este embalse está habitualmente lleno, aplicando la metodología de Miller se obtiene la densidad inicial del sedimento es  $\rho_i = 793 \text{ kg/m}^3$  y una constante de compactación  $k = 127$ .

Tras las importantes avenidas de 2010 y 2013, la batimetría de 2014 muestra que el embalse redujo su sedimentación a 7.37 hm<sup>3</sup>. Es probable que este valor se aproxime al embalse muerto pues bajo las aguas del embalse quedaron los antiguos saltos hidroeléctricos de Batanes y Villalba cuyos diques sumergidos retienen el sedimento, impidiendo una mayor recuperación de capacidad de embalse en episodios de avenida. Desde 2014 el embalse ha vuelto a perder capacidad, manteniéndose por encima de los 8.1 hm<sup>3</sup> de sedimento hasta la actualidad. La Figura 4a muestra la variación de densidad del sedimento retenido desde 2014. En las simulaciones numéricas de periodos inferiores a un año se considerará una densidad  $\rho = 800 \text{ kg/m}^3$  con una porosidad  $p = 0.7$ .

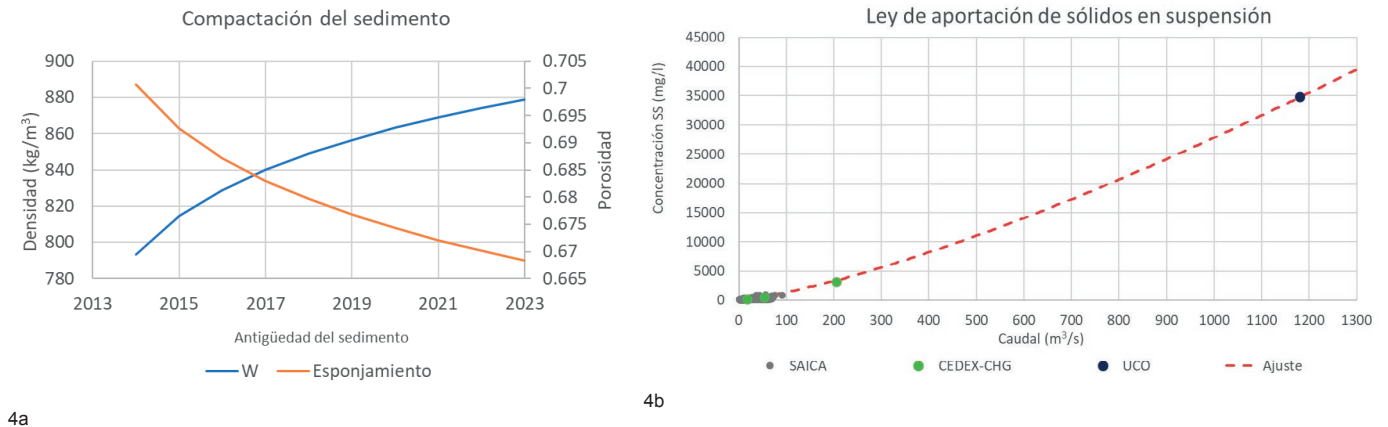

**Figura 4** | Ley de variación de la densidad y porosidad en función de la antigüedad en el embalse (4a). Ley concentración de sólidos en suspensión del caudal afluente al embalse (4b).

### Ajuste de una ley de concentración de sedimento en suspensión en función del caudal

Se propone obtener una relación que proporcione la concentración de SS en función del caudal, para lo que se ha empleado la expresión de tipo potencial de la Ecuación (6):

$$CSS(mg/l) = C_o + C_c Q^{\frac{a(Q-b)}{Q}} \quad (7)$$

Donde:  $C_o$  es una concentración base mínima;  $C_c$  es un coeficiente de calibración;  $Q$  es el caudal ( $m^3/s$ );  $a$  el exponente y  $b$  es un término reductor de la potencia para caudales bajos. Esta expresión se define para valores del caudal superiores a 1, para valores inferiores la concentración será igual a  $C_o$ .

Para obtener los coeficientes se ha buscado, por un lado, el mejor ajuste de los registros disponibles de aforos de SS y por otro, que el volumen sedimentado en el embalse en el período del 15 de enero al 24 de noviembre de 2020 sea de  $0.23 \text{ hm}^3$ . Asumiendo, como se explicó anteriormente, que todo el aporte queda retenido. Para ello, se parte de la ley de caudales y con la combinación de parámetros de la ecuación (7) se calcula el peso del sedimento que entra al embalse, que teniendo en cuenta una porosidad de 0.7, permite calcular el volumen de sedimentación. Con esta metodología se han realizado en un proceso iterativo el ajuste que se presenta en la ecuación (8) y Figura 4b.

$$CSS(mg/l) = 100 + 2.65Q^{\frac{1.34(Q-0.05)}{Q}} \quad (8)$$

### Casos de prueba

Con el fin de calibrar los parámetros del modelo de transporte de sedimentos se han realizado modelizaciones de algunos períodos de los que se dispone batimetría inicial y final. El 27 de septiembre de 2019 se obtuvo una batimetría del embalse. El día 24 de noviembre se produjo una pequeña avenida que superó los  $180 \text{ m}^3/s$ . Por ello, se decidió obtener otra batimetría el 2 de diciembre de 2019. La erosión resultante fue de  $0.15 \text{ hm}^3$ . Pocos días después, el día 21 de diciembre, se presentó una nueva avenida cuya punta superó los  $600 \text{ m}^3/s$ , razón por la cual se levantó una nueva batimetría el día 14 de enero de 2020. La erosión registrada superó  $0.5 \text{ hm}^3$ . Estos dos períodos han resultado muy adecuados para la calibración de los parámetros de erosión. También se han simulado los períodos comprendidos entre el 15 de enero al 24 de noviembre de 2020 y el lapso siguiente, entre el 25 de noviembre al 24 de febrero de 2021, durante el cual, la gestión de compuertas del embalse quedó condicionada a las labores de mantenimiento necesarias para sustituir una turbina de la central hidroeléctrica. Se mantuvieron las compuertas completamente abiertas desde el

26 de noviembre al 11 de enero. Posteriormente fue necesario mantener el nivel del embalse alto para garantizar la estanqueidad de un escudo situado aguas arriba de la presa, hasta la finalización de los trabajos. En estas circunstancias se presentó una pequeña avenida, de unos 160 m<sup>3</sup>/s, siendo necesario evacuarla manteniendo el nivel de explotación del embalse. La sedimentación neta fue de 0.02 hm<sup>3</sup>, lo que indica que la acumulación de sedimento por la avenida superó ligeramente la erosión del primer periodo con compuertas completamente abiertas.

Se realizaron unas trescientas simulaciones de los cuatro casos con el fin de calibrar los parámetros del modelo de transporte, es decir, las tensiones críticas de inicio de erosión y sedimentación y la velocidad de erosión. Aunque ambicioso, este trabajo se ha podido abordar en un periodo razonable de tiempo, gracias al empleo de las técnicas de supercomputación sobre GPUs. Con este proceso se ha obtenido la combinación de parámetros que permiten reproducir correctamente cada uno de los casos de prueba, sin embargo, estos resultados carecían de generalidad pues los que resultaban adecuados para un caso no lo eran para los demás. No obstante, se pudieron ajustar tensiones críticas de inicio de erosión y sedimentación coherentes dentro un rango de variación, pero era necesario un cambio sustancial en la velocidad de erosión de un escenario a otro. Para tratar de compatibilizar todos los casos de prueba se empezó a trabajar con una velocidad de erosión variable, lo cual resulta intuitivo pues la velocidad con la que se erosiona el material del fondo será mayor cuanto mayor sea los caudales y, por ende, las tensiones en el fondo del cauce.

## Modificación de la ley de transporte de sedimentos en suspensión para material cohesivos

Se propone un modelo análogo al de Arathurai y Arulanandam (1978) en el que se definen las tensiones críticas de erosión y sedimentación. Con tensiones en el fondo inferiores a la crítica de sedimentación ( $\tau_s$ ), el modelo sedimenta. La tensión crítica de inicio de erosión ( $\tau_{e,min}$ ) no tiene por qué ser igual a la crítica de sedimentación. Con tensiones de fondo en este intervalo el sedimento se mantiene en suspensión sin depositarse, ni erosionar. Superada la tensión de inicio de erosión, el sedimento del fondo comenzará a erosionar con una velocidad ascendente a medida que lo haga la tensión. Este modelo propone una relación lineal. También se establece un límite tensional máximo ( $\tau_{e,max}$ ) a partir del cual la velocidad de erosión se estabiliza. La Figura 5 ilustra las relaciones tensionales asociadas a los cambios de la velocidad de erosión.

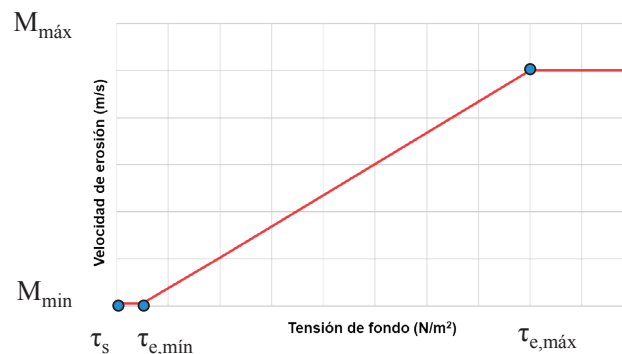

Figura 5 | Modelo de variación lineal de la velocidad de erosión.

## Modelo “0D” de sedimentación del embalse

Dada la amplia gama de variación de los parámetros de transporte, así como los largos periodos de simulación de cada uno de los casos de prueba, se ha visto la necesidad de modificar el método de trabajo. Se ha desarrollado un modelo “0D” del embalse, que permite calcular la evolución del volumen total de sedimentación del embalse, sin tener en cuenta su distribución espacial. Los inputs del modelo son el registro de aportación de caudal líquido y de nivel del embalse. A partir del caudal, el modelo calcula la aportación sólida con la relación propuesta en (8). Así mismo, en función del nivel del embalse se deduce la posición de compuertas. Cuando el embalse está al nivel de explotación, la apertura de compuertas es parcial, mientras que, con apertura total de compuertas, los niveles de embalse se ajustan a los de un vertedero de labio fijo. Finalmente, el modelo proporciona como resultado la evolución del volumen de sedimento acumulado en el embalse a lo largo del periodo simulado. Esta herramienta, BATHISTORIC, se ha programado en lenguaje



FORTTRAN. Lee de fichero la ley de caudal y nivel de embalse y genera un fichero de volumen almacenado en el embalse. Para ello, el modelo requiere una relación (9) que proporcione unas tasas volumétricas representativas de erosión/sedimentación (E/S) en función del caudal y nivel del embalse, que estará en relación con los parámetros del modelo de transporte de SS.

$$Tasa = F(Q, N_{emb}) = R(\tau_s, \tau_{e,min}, \tau_{e,max}, M_{max}, M_{min}) \quad (9)$$

Para cada formulación de tasa de E/S, el modelo proporcionará una evolución de la sedimentación del embalse diferente, y como herramienta de calibración del sistema se dispone de los volúmenes de sedimentación obtenidos con las batimetrías de la Tabla 1. Como restricciones se ha supuesto un embalse muerto de 7.1 hm<sup>3</sup> y se emplean las densidades de sedimento propuestas anteriormente, en el epígrafe correspondiente.

Existen diferentes técnicas de *Machine Learning* que proporcionan una metodología eficaz para obtener una formulación adecuada para las tasas de E/S (8), sin embargo, su empleo se ha descartado pues no permite establecer una relación directa con los parámetros del modelo de transporte de sedimento en suspensión. En su lugar se ha elaborado la técnica de “entrenamiento” del sistema, físicamente basada, que si proporciona esa relación, que se muestra a continuación

### **Machine Learning físicamente basado para la calibración de los parámetros de la ley de transporte**

El entrenamiento del sistema se ha abordado mediante simulación numérica bidimensional con el modelo R-Iber. Para ello, se ha establecido una batería de ensayos, considerando una gama de caudales de 10 a 2000 m<sup>3</sup>/s, dos escenarios de nivel de embalse, el de explotación y el de compuertas completamente abiertas y una combinación de los parámetros del modelo de transporte. Los ensayos se realizan con caudal constante. El análisis de los resultados se realiza una vez alcanzadas las condiciones de régimen permanente, lo que condiciona la duración de los ensayos. Alcanzadas dichas condiciones, se analiza la erosión o sedimentación que ha tenido el embalse, totalizando el volumen de todas las celdas del modelo. Relacionándolo con el volumen de agua aportado se obtiene una tasa volumétrica de E/S. El tiempo cálculo depende del caudal, con 10 m<sup>3</sup>/s, la simulación en R-iber tardó 130 s, frente a los 7784 s de Iber, con una aceleración de 60 x. Las simulaciones con 2000 m<sup>3</sup>/s duraron 1360 s en R-iber frente a las 36.8 h de Iber (97.5 x). Mediante interpolación de funciones polinómicas se obtiene una expresión analítica de las tasas, que se incorporan mediante las matrices de coeficientes en el modelo “0D” para obtener la evolución sedimentológica. Los registros batimétricos de la Tabla 1 permiten comprobar la bondad de la aproximación, proporcionando información para reajustar los parámetros del modelo de transporte de SS. De esta forma, en un proceso iterativo, es posible afinar la calibración del modelo. La Figura 6 ilustra este procedimiento.

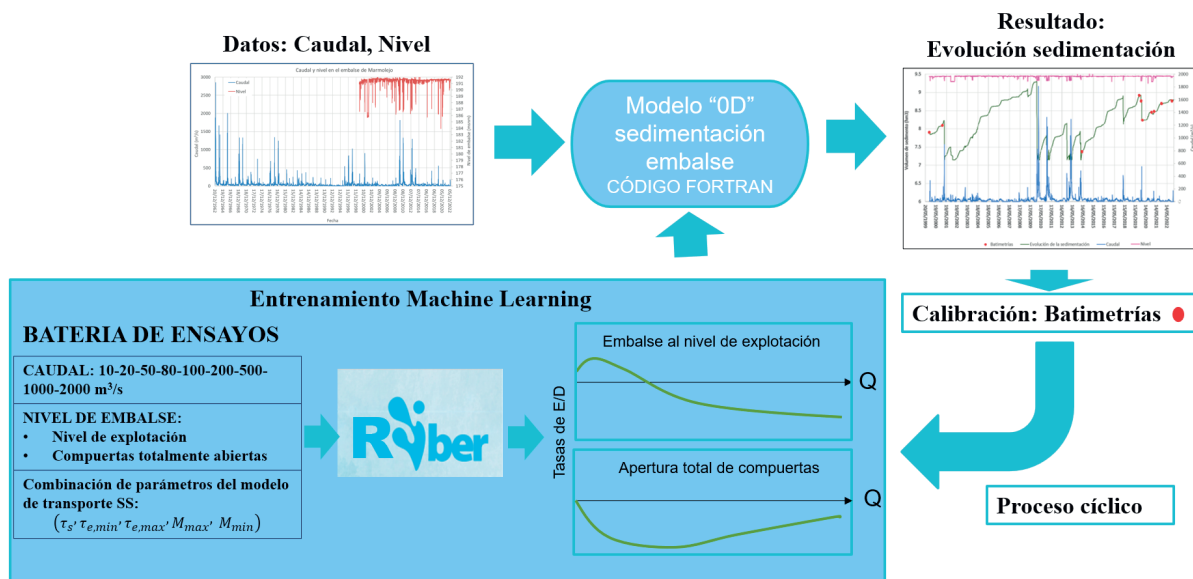

**Figura 6 | Metodología para la calibración de los parámetros del modelo transporte de SS y del modelo "0D" de sedimentación del embalse.**

## RESULTADOS

La campaña experimental ha permitido afinar el ajuste y obtener la evolución de la sedimentación del embalse de Marmolejo, desde que se disponen registros de nivel, que se muestra en la Figura 7. La línea azul muestra los caudales, la magenta los niveles de embalse, los puntos rojos los volúmenes de sedimentación registrados en las batimetrías y la línea verde el volumen de sedimento almacenado. Se aprecia que durante los episodios de avenida se produce un gran arrastre de sedimentos y como en los periodos secos, se produce un incremento continuo de sedimentación, que se produce de manera escalonada, lo que se explica por las campañas de regadío, que se turbinan manteniendo el nivel de explotación.

Los parámetros del modelo de transporte de sedimentos en suspensión que proporcionan este resultado son:  $\tau_s = 0.5 \text{ N/m}^2$ ;  $\tau_{e,\min} = 2.5 \text{ N/m}^2$ ;  $\tau_{e,\max} = 43 \text{ N/m}^2$ ;  $M_{\min} = 10^{-8} \text{ m/s}$ ;  $M_{\max} = 10^{-6} \text{ m/s}$ . Con estos valores se han obtenido las tasas de E/S de la gama de caudales ensayados. La expresión analítica de las funciones de tasa de E/S se ha definido, por tramos de caudal, mediante interpolación de funciones polinómicas de grado máximo 5. Las Figuras 8 y 9 presentan las tasas obtenidas experimentalmente, así como las funciones de ajuste que proporcionan las matrices de coeficientes.

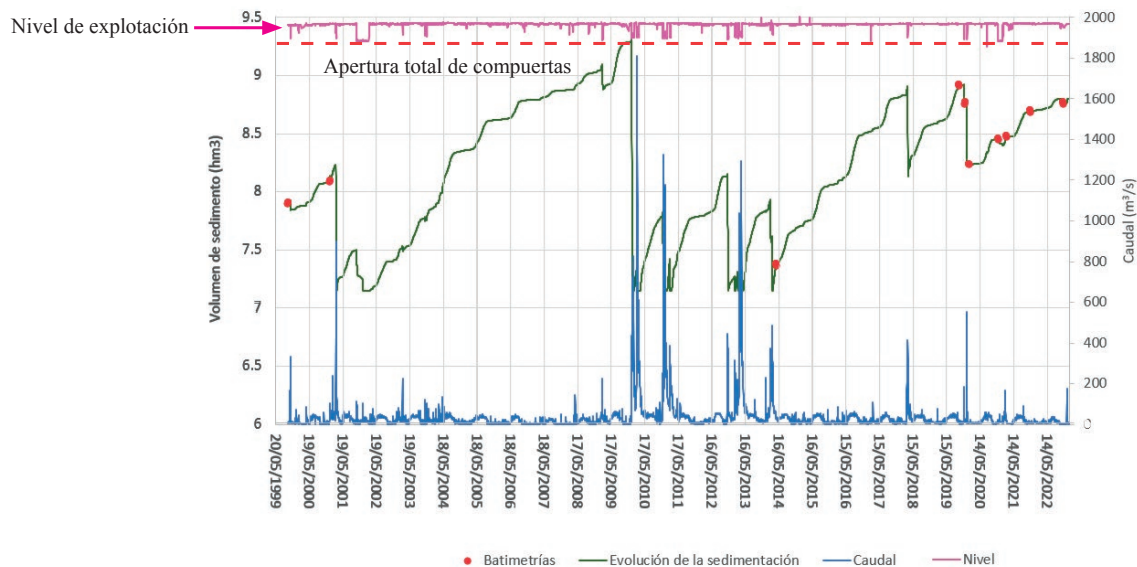

**Figura 7** | Ajuste obtenido de la evolución de la sedimentación del embalse de Marmolejo.

Esta técnica de entrenamiento físicamente basada presenta la ventaja, frente a otras técnicas de *machine learning*, de correlacionar los coeficientes de las leyes de ajuste obtenidos con los de los parámetros del modelo de transporte de la ecuación (8), lo que permite modelizar escenarios diferentes a los considerados en el entrenamiento.

De acuerdo con estos resultados, se han obtenido las tasas de erosión o sedimentación del embalse para diferentes caudales y en función de la forma de explotación en toneladas por hora (Tabla 3). Se aprecia que, con pequeños caudales, inferiores a  $180 \text{ m}^3/\text{s}$ , que son los más frecuentes en el río, y con apertura parcial de compuertas para mantener el nivel de explotación, el embalse tiene sedimentación neta mientras que, con apertura total de compuertas, siempre se produce erosión. Para poner en contexto la importancia de la gestión de compuertas sobre la sedimentación del embalse, apréciase que manteniéndose el nivel de explotación del embalse durante una hora con un caudal de  $100 \text{ m}^3/\text{s}$ , la sedimentación es próxima a las 380 toneladas, mientras que con compuertas completamente abiertas el balance se invertiría, erosionando en ese período unas 1660 toneladas.

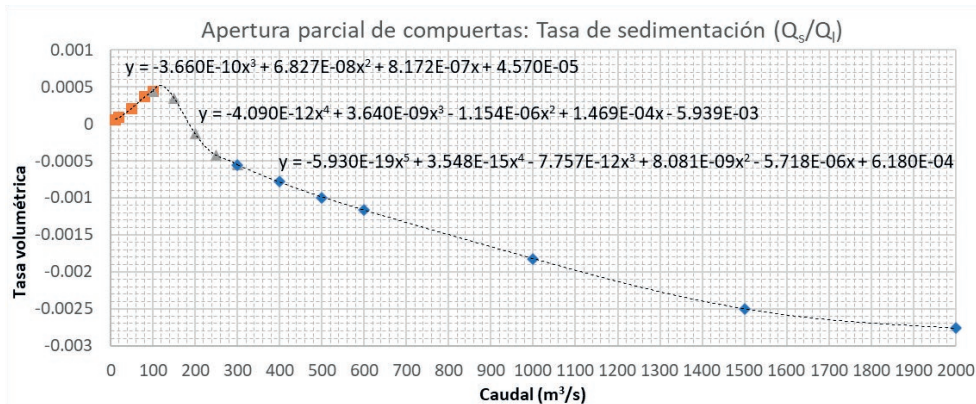

Figura 8 | Tasas experimentales para aperturas parciales manteniendo el nivel de explotación del embalse y funciones de ajuste

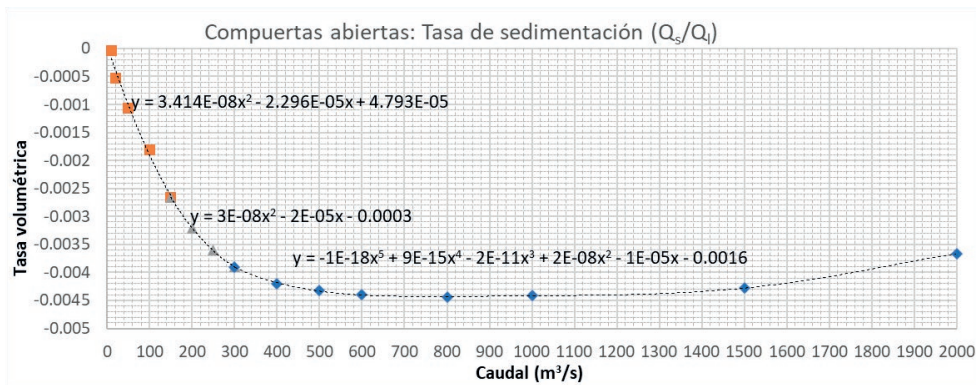

Figura 9 | Tasas experimentales con apertura total de compuertas y funciones de ajuste.

Tabla 3 | Tasas de erosión (negativo) / sedimentación (positivo) en toneladas por hora.

| Caudal (m³/s)             | 10   | 20    | 50   | 80      | 100     | 200     | 500      | 1000     | 2000     |
|---------------------------|------|-------|------|---------|---------|---------|----------|----------|----------|
| Apertura parcial (t/hora) | 5.6  | 17.1  | 93.6 | 246.6   | 379.1   | -78.9   | -1135.2  | -3658.4  | -14227.5 |
| Apertura total(t/hora)    | -4.0 | -91.8 | -483 | -1194.8 | -1660.8 | -5787.7 | -10485.2 | -19149.3 | -39603.9 |

### Aplicación web de ayuda a la decisión para la gestión de compuertas

Como herramienta complementaria se ha programado una aplicación web alojada en el servidor del CEDEX, que permite, por un lado, consultar la evolución histórica de la sedimentación del embalse, y por otro, simular la sedimentación de cualquier período con diferentes escenarios de apertura de compuertas. Dicha aplicación web se ha desarrollado con un esquema a dos niveles: *front-end* y *back-end*. El primero, que se ejecuta en el servidor, consulta diariamente a través de la API de la web del SAIH del Guadalquivir, los caudales y niveles medios diarios, valores con los que se completa el fichero de caudal y nivel de embalse. Seguidamente, el servidor ejecuta BATHISTORIC con los nuevos datos. El *front-end* se ejecuta en el explorador web del dispositivo desde el que se realiza la consulta y permite visualizar los datos diarios de caudal, nivel, posición de compuertas y sedimentación en el embalse, como se muestra en la Figura 10. En la parte inferior de la ventana se puede simular la sedimentación que se produciría en cualquier período de tiempo, acotándolo entre dos fechas, e indicando el caudal de consigna de explotación a

partir del cual se abren completamente las compuertas. Finalmente, esta aplicación permite descargar en fichero el resultado de la simulación para compararlo en diferentes escenarios.

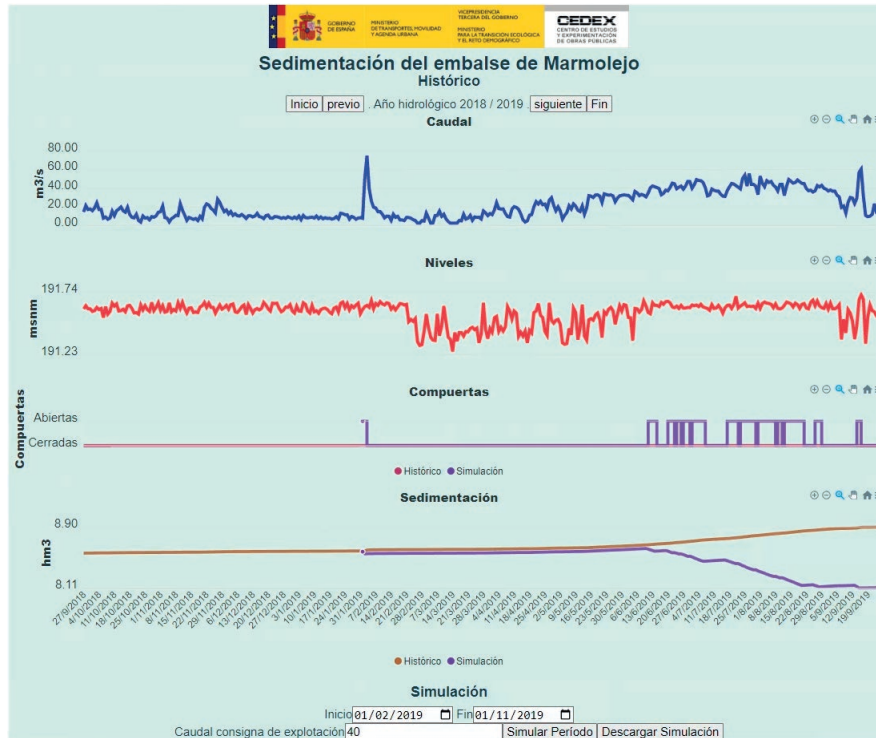

**Figura 10** | Visualización de resultados de la aplicación web para el seguimiento de la sedimentación en el embalse de Marmolejo. <https://ceh.cedex.es/marmoweb> (requiere usuario y contraseña. Contactar con autores)

## DISCUSIÓN

### Influencia de la consigna de explotación en la gestión de algunas avenidas

Se presenta a continuación la simulación de los períodos estudiados con diferentes consignas de compuerta. La Figura 11a muestra la sedimentación del embalse de acuerdo con las simulaciones realizadas con diferentes caudales consigna para apertura total de compuerta (50, 40, 30 y 25 m<sup>3</sup>/s), para el período comprendido entre septiembre y noviembre de 2019, durante el cual solamente se abrieron las compuertas 2 días. Con consigna de apertura a los 50 m<sup>3</sup>/s, se habría operado el embalse con tres días de apertura total, ese día adicional de apertura habría arrastrado unos 20000 m<sup>3</sup> de sedimento. Con una consigna de apertura a 25 m<sup>3</sup>/s, los días con apertura total habrían sido 6 con lo que se habrían llegado a movilizar otros 56000 m<sup>3</sup>. La Figura 11b muestran el análisis para la avenida de diciembre de 2019. Se aprecia que habiendo adelantado un día y retrasado otro las maniobras de apertura total la erosión en este período habría alcanzado los 756000 m<sup>3</sup>. La Figura 11c corresponde al período de enero a noviembre de 2020. Durante este intervalo temporal solamente se abrieron totalmente las compuertas un día. Se aprecia que, durante los meses de julio a septiembre, en la campaña de riego, se produjo la acumulación de sedimento más importante del período. Con una consigna de explotación de 50 m<sup>3</sup>/s, se habrían abierto totalmente las compuertas 12 días lo que habría permitido arrastrar unos 251000 hm<sup>3</sup>. La consigna de 25 m<sup>3</sup>/s, habría implicado la apertura total durante 88 días, movilizándose más de 860000 m<sup>3</sup>. Por último, se muestra el período de noviembre de 2020 a febrero de 2021 (Figura 11d), durante el que se realizaron las obras de sustitución de un grupo de la central hidroeléctrica lo que, como se explicó anteriormente, obligó a mantener las compuertas totalmente abiertas durante 50 días, durante los cuales, de acuerdo con el modelo, se generó una erosión de unos 70000 m<sup>3</sup>. En la segunda fase de los trabajos, se dispuso

un escudo en la embocadura del conducto de la central, lo que forzaba a mantener el nivel de embalse a la cota de explotación, para mantener una presión hidrostática que garantizara la estanqueidad en la central. De este modo, cuando se presentó la avenida de febrero de 2021, no fue posible abrir totalmente las compuertas, sedimentando un volumen mayor que erosionado en el período anterior. Si se hubiera podido abrir las compuertas la erosión habría sido importante. Se aprecia en la Figura 11d, que con consigna 50 m<sup>3</sup>/s habrían sido 2 los días adicionales de apertura total durante los que se habría arrastrado unos 435 000 m<sup>3</sup>. La consigna de 25 m<sup>3</sup>/s hubiera requerido de 22 días adicionales de apertura y habrían permitido erosionar algo más de 0.55 hm<sup>3</sup>.

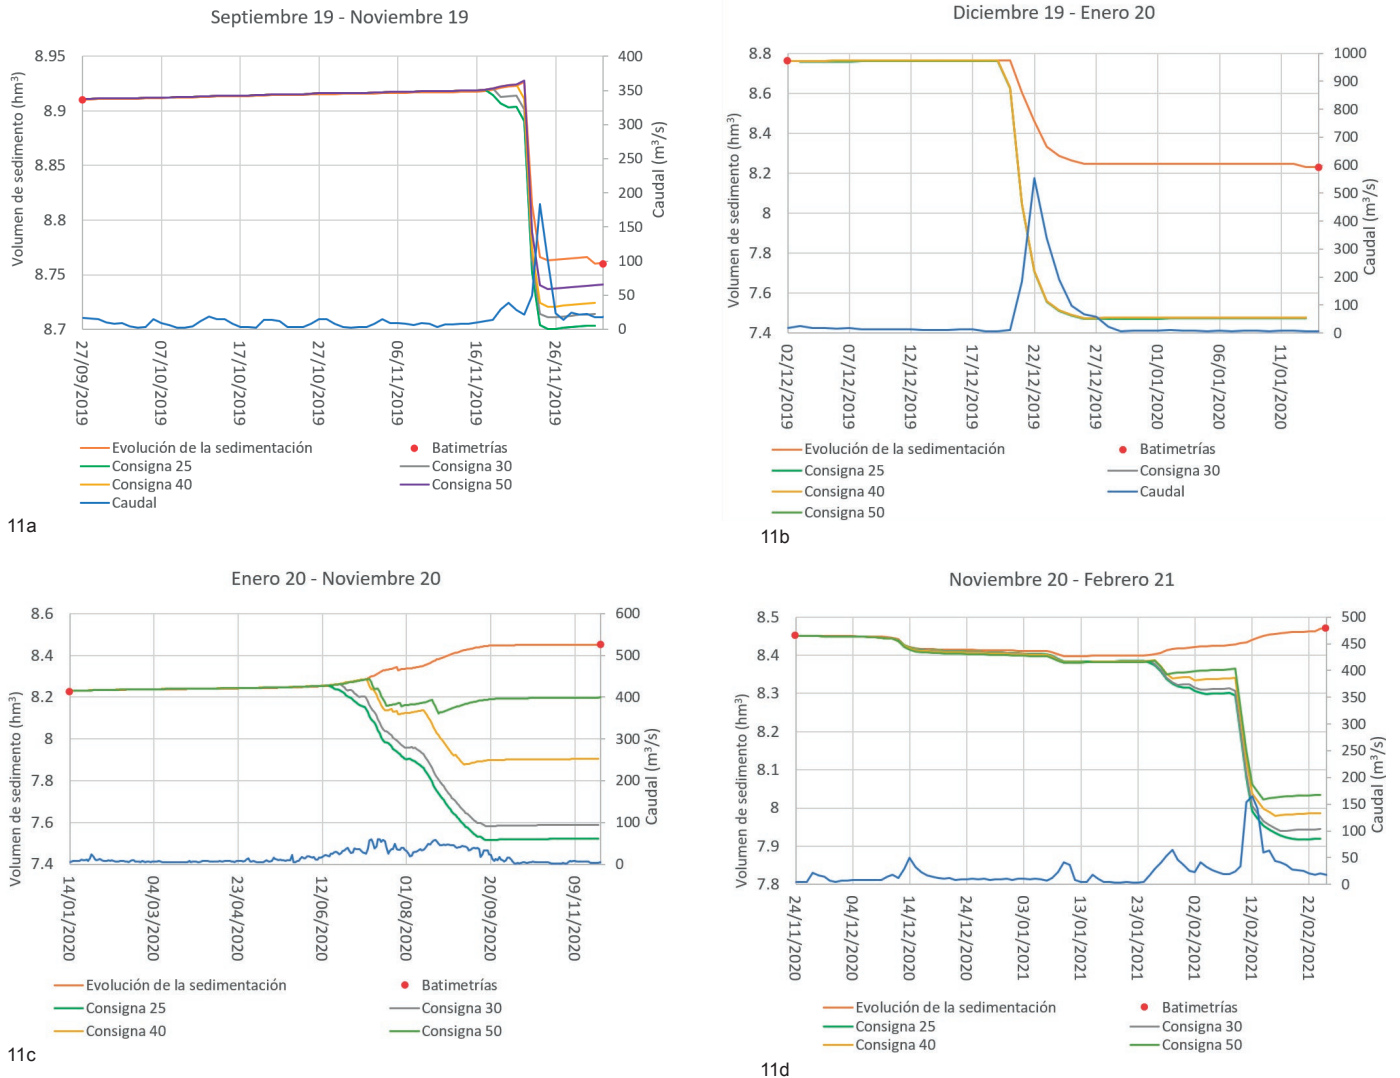

**Figura 11** | Influencia de la consigna de explotación en la evolución de la sedimentación del embalse de Marmolejo en diferentes períodos.

## Estimación de la evolución de las tasas de aportación de sedimentos al embalse de Marmolejo

Los resultados obtenidos están muy condicionados por la carga real de sedimentos que llega al embalse. Con el fin de poner en contexto la aportación de sedimentos se ha calculado la ley de aportaciones al embalse, partiendo de la ley de caudales medios diarios de la Figura 3a y empleando la ecuación (8). Para facilitar el análisis se presenta en la Figura 12a, la ley de aportación de sedimento acumulada desde la entrada en servicio de la presa, expresada en millones de toneladas y referida al caudal medio

que resulta ser de 1.45 Mt/año. Las máximas tasas de transporte superan los 6.28 Mt/año, reduciéndose en algunos periodos a valores mínimos en torno a 0.23 Mt/año. Por otro lado, se ha realizado una modelación de la erosión del suelo en las 313199 ha de cuenca que regula el embalse de Marmolejo desde sus embalses de cabecera, con el modelo RUSLE (*Revised Universal Soil Loss Equation*), que proporciona el promedio de pérdidas anuales de suelo a largo plazo (t/ha-año). El modelo consta de 125 millones de celdas de 5×5 m de precisión. El valor de R se ha obtenido, siguiendo el criterio de Wischmeier y Smith (1978), a partir del mapa Factor R del Servicio Web de Mapas (SWM) del MITECO. El factor K de erosionabilidad de suelos, se ha obtenido con las texturas de los del servicio WMS de la de la Junta de Andalucía. El valor del coeficiente K, asignado a cada textura del suelo, es el propuesto por el *US Department of Agriculture - Agricultural Research Service* (Meyer *et al.*, 1975). Los valores de C se han obtenido a partir de una capa de usos del suelo, del *Corine Land Cover* (2018), incluido en el programa europeo “Copernicus”. Los factores L y S se obtuvieron del modelo digital del terreno (MDT) y, careciendo de datos para estimar el factor, P se ha considerado igual a 1 lo que asume que no se aplican las prácticas mecánicas de conservación de suelos y el laboreo se realiza en el sentido de la dirección de la pendiente. La Figura 12b muestra el resultado. La erosión media resultante es de 48.76 t/ha/año, con una horquilla que acota la erosión total de la cuenca entre 10.73 Mt/año y 17.95 Mt/año, con un valor promedio de 48.76 t/ha/año, lo que resulta coherente con otros estudios regionales López-Cuervo (1990) y Gómez *et al.* (2003). La gran extensión relativa del olivar en esta cuenca justifica que la erosión obtenida supere la media del INES para la provincia de Jaén. Si comparamos las tasas medias de erosión anual con las aportaciones calculadas, se comprueba que el coeficiente de entrega de sedimento de la cuenca al embalse de Marmolejo se sitúa en torno al 9.5 %, lo que resulta coherente con la estimación realizada por CEDEX (2015).

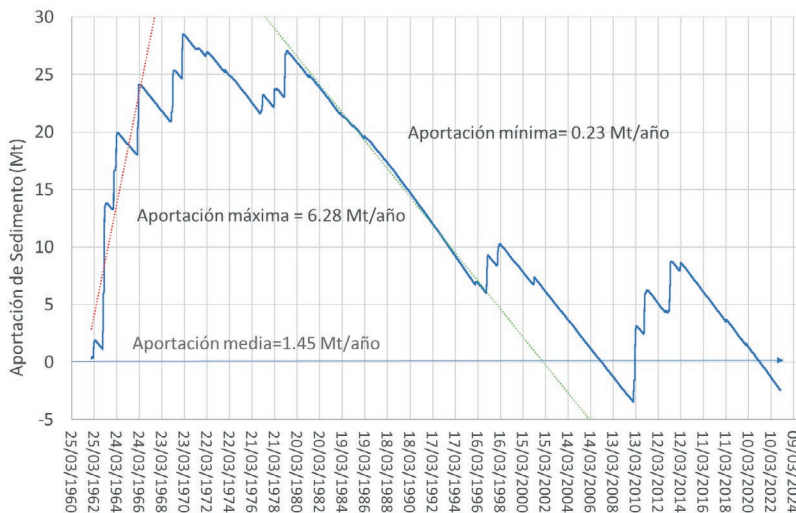

12a

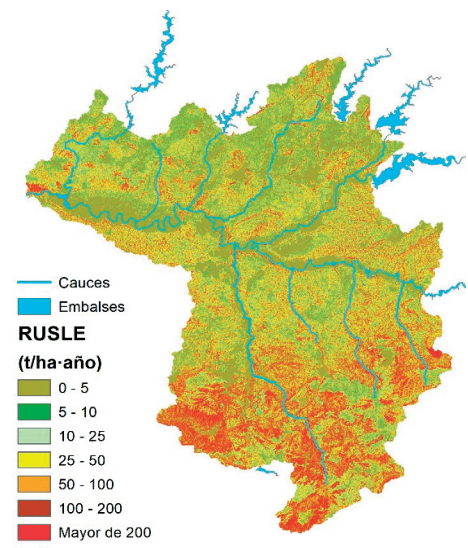

12b

**Figura 12** | Evolución de la aportación de sólidos al embalse de Marmolejo desde su puesta en servicio (12a). Mapa de pérdidas promedio anuales de suelo a largo plazo (t/ha-año) (12b).

## CONCLUSIONES

En este artículo se presenta, por un lado, el importante avance tecnológico que supone la implementación de técnicas de supercomputación en la modelización hidráulica con el desarrollo de la herramienta R-Iber para GPU. Por otro lado, una modificación del modelo de Ariathurai y Arulanandan, de amplia aceptación en el ámbito científico-técnico para material cohesivo, que modula la velocidad de erosión, con un rango de variación lineal dependiente de la tensión de fondo. Adicionalmente, se muestra una aplicación de *machine learning*, físicamente basada, aplicada a la calibración del modelo de transporte de sedimentos en el embalse de Marmolejo. También se ha desarrollado una herramienta web que permite consultar la evolución sedimentológica del embalse, y que, además, proporciona ayuda a la decisión pues, permite extraer conclusiones de la simulación de diferentes escenarios de

explotación, para optimizar la gestión del embalse incluyendo el sedimento en la ecuación. Finalmente, se ha demostrado que la sedimentación del embalse de Marmolejo es reversible, descontando el embalse muerto que generan el propio dique de la presa y el de los antiguos saltos anegados de Villalba y Batanes. Además, se ha mostrado cómo es posible mantener el nivel de sedimentación del embalse de Marmolejo por debajo de los niveles de seguridad que garantizan las medidas de defensa frente a inundaciones de Andújar. Para ello, es fundamental la gestión de compuertas en episodios de avenida.

---

## AGRADECIMIENTOS

A la Confederación Hidrográfica del Guadalquivir y a ENDESA por la inestimable ayuda prestada para la realización de esta investigación y a los responsables del CPD del Centro de Estudios Hidrográficos del CEDEX.

---

## REFERENCIAS

- Ariathurai, R., Arulanandan, K. 1978. Erosion rate of cohesive soils. *ASCE Journal of the Hydraulics Division*, 104(HY2), 279–283. <https://doi.org/10.1061/JYCEAJ.0004937>
- Bladé, E., Cea, L., Corestein, G., Escolano, E., Puertas, J., Vázquez-Cendón, E., Dolz, J., Coll, A. 2014. Iber: herramienta de simulación numérica del flujo en ríos. *Revista Internacional de Métodos Numéricos para Cálculo y Diseño en Ingeniería*, 30(1), 1-10, <https://doi.org/10.1016/j.rimni.2012.07.004>
- Carpintero, M. 2015. *Characterization of suspended sediments in the Guadalquivir estuary at modeled scale*. Tesis doctoral de Miriam Carpintero García. Departamento de Agronomía. Universidad de Córdoba, abril de 2015.
- CEDEX, 2014. *Modelación hidráulica de los ríos Guadalquivir y Jándula en el entorno urbano de Andújar (Jaén) y análisis de la influencia de la presa de Marmolejo. Documento de síntesis de los estudios realizados con anterioridad*. Informe parcial.
- CEDEX, 2015. *Modelación hidráulica de los ríos Guadalquivir y Jándula en el entorno urbano de Andújar (Jaén) y análisis de la influencia de la presa de Marmolejo*. Informe final.
- CEDEX, 2021. *Estudio de la Influencia de la Presa de Marmolejo en la Sedimentación del Embalse y sobre la inundabilidad de Andújar (Jaén)*. Informe parcial.
- Contreras, E. 2012. *Influencia de los aportes fluviales en la calidad del agua del estuario del Guadalquivir*. Tesis doctoral de Eva Contreras Arribas. Departamento de Agronomía. Universidad de Córdoba, diciembre de 2012.
- Gómez, J.A. Battany, M., Renschler, C.S., Fereres, E. 2003. Evaluating the impact of soil management on soil loss in olive orchards. *Soil Use Management*, 19, 127-134. <https://doi.org/10.1079/SUM2002179>
- INTECSA – INARSA. 2002. Estudio de la sedimentación en el embalse de Marmolejo.
- INTECSA – INARSA. 2003. Estudio de transporte y sedimentación en el tramo del río Guadalquivir que comprende el encauzamiento proyectado en las inmediaciones de Andújar.
- López, D., Díaz, R., Rebollo, J.J., Ramos, T., Andrés, F.R., Berga, M.I. 2016. Aplicación del método SPH al estudio hidráulico de estructuras. Análisis hidrodinámico del aliviadero en pozo de la presa de Nagore (Navarra). *RIBAGUA - Revista Iberoamericana del Agua* 3(1), 1–7. <https://doi.org/10.1016/j.riba.2016.03.001>
- López, D., Ramos, T., Sánchez, P., Marivela, R., Díaz, R., Rebollo, J.J., Andrés, F.R., Cuellar, V. de Blas, M., García, J.L. 2018. Smoothed Particle Hydrodynamics Method for Three-Dimensional Open Channel Flow Simulations. *Journal of Applied Fluid Mechanics*, 11(6), 1599–1611, 2018. <https://doi.org/10.29252/jafm.11.06.28608>

- López, D. Cuellar, V. 2011. Paralelización CUDA del método SPH. Aplicaciones en el diseño de estructuras hidráulicas. *III Jornadas de Ingeniería del Agua*, Barcelona. JIA.
- López-Cuervo, S. 1990. *La erosión en los suelos de Andalucía. Congresos y Jornadas de Agricultura y Pesca 17/90*. Sevilla, España.
- Meyer, L.D., Foster, G.R., Romkens, M.J.M. 1975. *Source of soil eroded by water from upland slopes. Present and Prospective Technology for Predicting Sediment Yields and Sources*. USDA, Agr. Res. Serv. ARS-S-40: 177-189.
- Miller, C.R. 1953. Determination of the Unit Weight of Sediment for Use in Sediment Volume Computations. Bureau of Reclamation, Denver, Colorado.
- Sanz-Ramos, M., López-Gómez, D., Bladé, E., Dehghan-Souraki, D. 2022. A CUDA Fortran GPU-parallelized hydrodynamic tool for high-resolution and long-term eco-hydraulic modelling. *Environmental Modelling & Software*, 161(March 2023), 105628. <https://doi.org/10.1016/j.envsoft.2023.105628>
- Sanz-Ramos, M., Bladé, E., Silva-Cancino, Salazar, F., López-Gómez, D., Martínez-Gomáriz, E. 2023. A Probabilistic Approach for Off-Stream Reservoir Failure Flood Hazard Assessment. *Water*, 15(12), 2202. <https://doi.org/10.3390/w15122202>
- Van Rijn, L.C. 1984. Sediment Transport, Part II: Suspended Load Transport. *Journal of Hydraulic Engineering*, 110(11), 1613–1641. [https://doi.org/10.1061/\(ASCE\)0733-9429\(1984\)110:11\(1613\)](https://doi.org/10.1061/(ASCE)0733-9429(1984)110:11(1613))
- TYPSA. 1997. Síntesis del Estudio hidráulico de detalle del río Guadalquivir en el tramo La Ropera – Andújar.
- Wischmeier, W.H., Smith D.D. 1978. *Predicting Rainfall-Erosion Losses: A Guide to Conservation Planning. Agriculture Handbook (AH) 537*. U.S. Dept. of Agriculture, Washington, DC. USA.
